# Supplementary material for: Facile synthesis of cyclosiloxane-based polymers for hybrid film formation
Source: Royal Society of Chemistry journal article supplement (doi:10.1039/c5py00018a), 2015-01-01
Supplement: c5py00018a1.pdf [file c5py00018a1.pdf]

## Supplementary Information

### Facile Synthesis of Cyclosiloxane-Based Polymers for Hybrid Film Formation

Ali Demirci,<sup>a</sup> Shunsuke Yamamoto,<sup>a</sup> Jun Matsui,<sup>b</sup> Tokuji Miyashita,<sup>a</sup> Masaya Mitsuishi <sup>\*a</sup>

<sup>a</sup>Institute of Multidisciplinary Research for Advanced Materials (IMRAM), Tohoku University, 2-1-1 Katahira, Aoba-ku, Sendai 980-8577, Japan <sup>b</sup> Department of Material and Biological Chemistry, Faculty of Science, Yamagata University, 1-4-12 Kojirakawamachi, Yamagata 990-8560, Japan

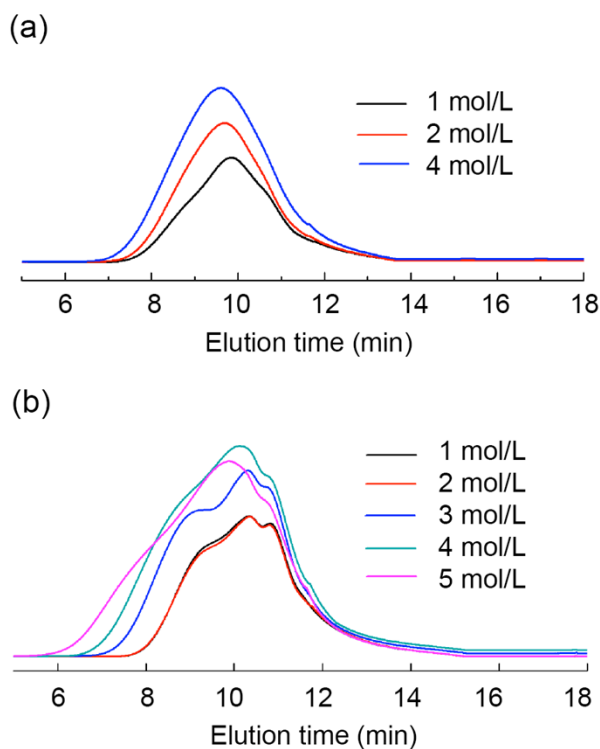

(a)

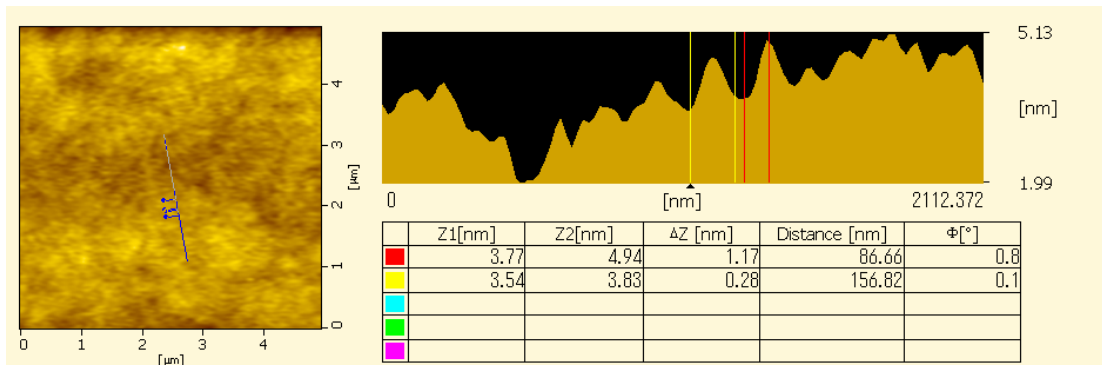

(b)

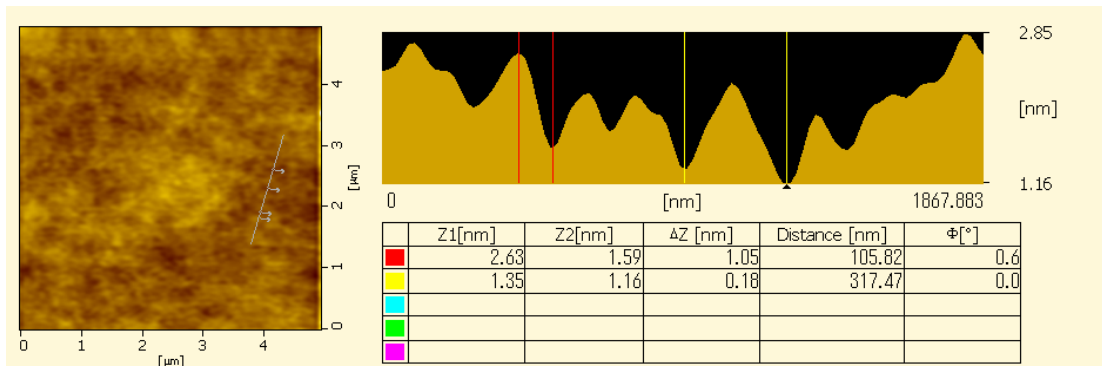

Figure S2 Cross-section AFM images for (a) TMCS-DTMS and (b) TMCS<sup>^</sup>DVHS hybrid polymer films
